# Supplementary material for: Long-Term Effects of Soil Remediation with Willow Short Rotation Coppice on Biogeographic Pattern of Microbial Functional Genes
Source: MDPI journal article supplement (doi:10.3390/microorganisms10010140), 2022-01-11
Supplement: s1 [file s1]

**Table S1.** Mantel tests for correlations of microbial functional genes with between soil chemical properties or , biochemical activity and functional gene structure based on Bray-Curtis distance in untreated soils ( C ) and Salix treated soils ( SRC ) . \* indicates  $p$ -value  $\leq 0.05$ ; \*\* = significant at  $p$ -value  $\leq 0.01$ ; \*\*\* = significant at  $p$ -value  $\leq 0.001$ .

|                          | C            |               | SRC          |               | Total (C&SRC) |                 |
|--------------------------|--------------|---------------|--------------|---------------|---------------|-----------------|
|                          | r            | p             | r            | p             | r             | p               |
| Arylesterase             | 0.083        | 0.188         | -0.153       | 0.917         | -0.046        | 0.624           |
| Arylsulfatase            | -0.069       | 0.598         | 0.042        | 0.294         | -0.130        | 0.942           |
| Acid.phosphatase         | 0.065        | 0.238         | 0.178        | 0.096         | 0.113         | 0.091           |
| Alkaline.phosphatase     | 0.091        | 0.196         | -0.076       | 0.691         | -0.101        | 0.939           |
| phosphodiesterase        | 0.076        | 0.243         | 0.242        | 0.068         | 0.022         | 0.334           |
| b-glucosidase            | 0.205        | 0.119         | 0.147        | 0.140         | -0.077        | 0.793           |
| b-galactosidase          | 0.119        | 0.129         | <b>0.262</b> | <b>0.034*</b> | 0.088         | 0.145           |
| urease                   | 0.029        | 0.345         | -0.020       | 0.421         | -0.062        | 0.675           |
| protease                 | -0.142       | 0.936         | 0.078        | 0.229         | <b>0.212</b>  | <b>0.001***</b> |
| dehydrogenase            | -0.120       | 0.758         | 0.171        | 0.106         | -0.024        | 0.562           |
| ATP                      | -0.038       | 0.595         | -0.050       | 0.647         | 0.080         | 0.158           |
| CO2                      | 0.133        | 0.145         | -0.168       | 0.918         | <b>0.264</b>  | <b>0.027*</b>   |
| BioTox                   | 0.018        | 0.351         | <b>0.297</b> | <b>0.041*</b> | -0.005        | 0.473           |
| Nitrification potential  | <b>0.353</b> | <b>0.025*</b> | 0.011        | 0.372         | <b>0.238</b>  | <b>0.016*</b>   |
| Ammonification potential | -0.023       | 0.532         | 0.023        | 0.372         | 0.056         | 0.262           |

|           |              |               |              |                |              |                 |
|-----------|--------------|---------------|--------------|----------------|--------------|-----------------|
| pH        | -0.060       | 0.632         | <b>0.466</b> | <b>0.003**</b> | 0.071        | 0.170           |
| Organic C | -0.061       | 0.562         | -0.025       | 0.534          | -0.080       | 0.784           |
| Total N   | -0.053       | 0.568         | -0.159       | 0.903          | 0.011        | 0.389           |
| NH4-N     | 0.113        | 0.165         | 0.030        | 0.320          | 0.103        | 0.128           |
| NO3-N     | -0.025       | 0.461         | -0.052       | 0.568          | <b>0.252</b> | <b>0.041*</b>   |
| Total P   | <b>0.315</b> | <b>0.035*</b> | -0.171       | 0.897          | -0.104       | 0.846           |
| Olsen P   | -0.076       | 0.720         | -0.002       | 0.466          | <b>0.276</b> | <b>0.001***</b> |
| Soluble P | <b>0.380</b> | <b>0.002*</b> | 0.191        | 0.073          | <b>0.178</b> | <b>0.008**</b>  |
| Organic P | -0.142       | 0.865         | 0.120        | 0.168          | -0.034       | 0.525           |
| Al tot    | -0.049       | 0.589         | 0.067        | 0.207          | 0.136        | 0.090           |
| As tot    | -0.190       | 0.937         | -0.043       | 0.595          | <b>0.235</b> | <b>0.001***</b> |
| Cd tot    | <b>0.246</b> | <b>0.017*</b> | 0.157        | 0.175          | <b>0.326</b> | <b>0.001***</b> |
| Cr tot    | 0.183        | 0.094         | -0.099       | 0.765          | <b>0.203</b> | <b>0.001***</b> |
| Cu tot    | 0.102        | 0.207         | -0.071       | 0.589          | <b>0.239</b> | <b>0.001***</b> |
| Mn tot    | 0.236        | 0.088         | 0.075        | 0.214          | <b>0.287</b> | <b>0.001***</b> |
| Ni tot    | 0.231        | 0.088         | -0.030       | 0.547          | 0.144        | 0.064           |
| Pb tot    | 0.048        | 0.298         | -0.093       | 0.777          | 0.016        | 0.373           |
| Zn tot    | 0.129        | 0.161         | <b>0.290</b> | <b>0.044*</b>  | <b>0.204</b> | <b>0.021*</b>   |
| Na tot    | -0.170       | 0.904         | 0.183        | 0.093          | <b>0.241</b> | <b>0.001***</b> |
| Ca tot    | 0.078        | 0.202         | 0.096        | 0.139          | <b>0.219</b> | <b>0.025*</b>   |
| K tot     | <b>0.286</b> | <b>0.033*</b> | 0.129        | 0.143          | <b>0.270</b> | <b>0.001***</b> |
| Mg tot    | -0.111       | 0.913         | 0.130        | 0.161          | -0.070       | 0.828           |
| Fe tot    | -0.056       | 0.518         | -0.020       | 0.433          | -0.067       | 0.705           |
| Al av     | -0.152       | 0.881         | -0.028       | 0.455          | <b>0.255</b> | <b>0.001***</b> |
| As av     | -0.213       | 0.966         | 0.147        | 0.129          | 0.165        | <b>0.047*</b>   |
| Cd av     | 0.037        | 0.312         | 0.041        | 0.303          | <b>0.216</b> | <b>0.014*</b>   |

|       |        |       |              |              |              |                 |
|-------|--------|-------|--------------|--------------|--------------|-----------------|
| Cr av | -0 006 | 0 449 | -0 168       | 0 966        | -0 004       | 0 452           |
| Cu av | -0 123 | 0 806 | -0 094       | 0 769        | <b>0 230</b> | <b>0 001***</b> |
| Mn av | -0 059 | 0 695 | 0 029        | 0 329        | <b>0 158</b> | <b>0 024*</b>   |
| Ni av | 0 200  | 0 134 | <b>0 255</b> | <b>0 04*</b> | 0 056        | 0 169           |
| Pb av | 0 210  | 0 110 | <b>0 231</b> | <b>0 04*</b> | <b>0 259</b> | <b>0 001*</b>   |
| Zn av | -0 167 | 0 878 | 0 086        | 0 200        | <b>0 149</b> | <b>0 035*</b>   |
| Na av | 0 173  | 0 139 | -0 006       | 0 455        | -0 054       | 0 718           |
| Ca av | -0 100 | 0 646 | 0 103        | 0 152        | <b>0 134</b> | <b>0 038*</b>   |
| K av  | -0 081 | 0 765 | -0 140       | 0 914        | 0 023        | 0 329           |
| Mg av | 0 007  | 0 389 | 0 105        | 0 140        | <b>0 175</b> | <b>0 001*</b>   |
| Fe av | -0 101 | 0 691 | -0 019       | 0 473        | <b>0 175</b> | <b>0 028*</b>   |
